# Supplementary material for: Interventions for Preventing Residential Fires in Vulnerable Neighbourhoods and Indigenous Communities: A Systematic Review of the Literature
Source: MDPI journal article supplement (doi:10.3390/ijerph19095434), 2022-04-29
Supplement: s1 [file s1]

## Supplementary Report S1

### Residential Fires Systematic Review Search Report

#### Search Results

| Database/ Source                                                  | Date Searched  | # of Results |
|-------------------------------------------------------------------|----------------|--------------|
| MEDLINE (Ovid)                                                    | August 4, 2021 | 700          |
| Embase (Ovid)                                                     | August 4, 2021 | 892          |
| CENTRAL (Ovid)                                                    | August 4, 2021 | 94           |
| Web of Science Core Collection                                    | August 4, 2021 | 1511         |
| Trophy                                                            | August 4, 2021 | 2            |
| PAIS Index (ProQuest)                                             | August 4, 2021 | 61           |
| ERIC (EBSCO)                                                      | August 4, 2021 | 123          |
| FireDOC                                                           | August 4, 2021 | 86           |
| IEEE Xplore                                                       | August 4, 2021 | 23           |
| Native Health Database                                            | August 4, 2021 | 15           |
| Google Scholar                                                    | August 4, 2021 | 221          |
| Database search total                                             | ---            | 3,727        |
|                                                                   |                |              |
| ProQuest Dissertations & Theses Global                            | August 5, 2021 | 22           |
| The Networked Digital library of Theses and Dissertations (NDLTD) | August 5, 2021 | 57           |
| PapersFirst (via WorldCat FirstSearch)                            | August 5, 2021 | 13           |
| Proceedings (via WorldCat FirstSearch)                            | August 5, 2021 | 105          |
| OpenGrey                                                          | August 5, 2021 | 2            |
| Grey Literature Report                                            | August 5, 2021 | 0            |

|                                                                                                                                                                                                 |                |     |
|-------------------------------------------------------------------------------------------------------------------------------------------------------------------------------------------------|----------------|-----|
| DesLibris                                                                                                                                                                                       | August 6, 2021 | 26  |
| Australian Institute of Health and Welfare<br>( <a href="https://www.aihw.gov.au/reports-data/">https://www.aihw.gov.au/reports-data/</a> )                                                     |                | 0   |
| New Zealand Ministry of Health Library<br>( <a href="https://www.health.govt.nz/about-ministry/ministry-health-library">https://www.health.govt.nz/about-ministry/ministry-health-library</a> ) |                | 1   |
| Govinfo<br>( <a href="https://www.govinfo.gov/">https://www.govinfo.gov/</a> )                                                                                                                  |                | 0   |
| Training Programs in Epidemiology and Public Health Interventions Network (TEPHINET)                                                                                                            |                | 0   |
| Google Search targeted to organizations in Australia, New Zealand, US and Canada                                                                                                                |                | 394 |
| <b>Total Grey Literature</b>                                                                                                                                                                    | ---            | 620 |

#### Search Strategies

##### MEDLINE

#### Link:

[Click to run search](#)

The above Jumpstart will only work for users who have access to this specific database.

#### Database:

Ovid MEDLINE(R) and Epub Ahead of Print, In-Process, In-Data-Review & Other Non-Indexed Citations, Daily and Versions(R) <1946 to August 03, 2021>

| # | Query  | Results from 4 Aug 2021 |
|---|--------|-------------------------|
| 1 | Fires/ | 9,812                   |

|    |                                                                                                         |            |
|----|---------------------------------------------------------------------------------------------------------|------------|
| 2  | housing/ or housing for the elderly/ or public housing/ or refugee camps/ or independent living/        | 29,509     |
| 3  | Accidents, Home/                                                                                        | 4,595      |
| 4  | 2 or 3                                                                                                  | 33,958     |
| 5  | 1 and 4                                                                                                 | 361        |
| 6  | (fire? adj10 (hous* or home? or residen*)).tw,kw.                                                       | 1,091      |
| 7  | 5 or 6                                                                                                  | 1,305      |
| 8  | Accident prevention/                                                                                    | 9,224      |
| 9  | Health Promotion/                                                                                       | 77,129     |
| 10 | Health education/                                                                                       | 62,060     |
| 11 | pc.fs.                                                                                                  | 1,355,349  |
| 12 | (prevent* or reduc* or decrease? or intervention? or promot* or improve? or program* or educat*).tw,kf. | 9,526,161  |
| 13 | or/8-12                                                                                                 | 10,125,853 |
| 14 | 7 and 13                                                                                                | 800        |
| 15 | limit 14 to yr="1990 -Current"                                                                          | 700        |

Embase

**Link:**

[Click to run search](#)

The above Jumpstart will only work for users who have access to this specific database.

**Database:**

Embase <1974 to 2021 August 03>

| #  | Query                                                | Results<br>from 4 Aug<br>2021 |
|----|------------------------------------------------------|-------------------------------|
| 1  | fire/                                                | 12,671                        |
| 2  | housing/                                             | 26,468                        |
| 3  | home for the aged/                                   | 11,195                        |
| 4  | refugee camp/                                        | 834                           |
| 5  | independent living/                                  | 5,509                         |
| 6  | home accident/                                       | 3,141                         |
| 7  | or/2-6                                               | 46,586                        |
| 8  | 1 and 7                                              | 294                           |
| 9  | (fire? adj10 (hous* or home? or<br>residen*)).tw,kw. | 1,454                         |
| 10 | 8 or 9                                               | 1,625                         |
| 11 | accident prevention/                                 | 15,837                        |

|    |                                                                                                         |            |
|----|---------------------------------------------------------------------------------------------------------|------------|
| 12 | health promotion/ or health education/                                                                  | 190,148    |
| 13 | public health campaign/ or public health message/                                                       | 3,443      |
| 14 | pc.fs.                                                                                                  | 1,168,364  |
| 15 | (prevent* or reduc* or decrease? or intervention? or promot* or improve? or program* or educat*).tw,kw. | 12,257,839 |
| 16 | or/11-15                                                                                                | 12,810,115 |
| 17 | 10 and 16                                                                                               | 999        |
| 18 | limit 17 to yr="1990 -Current"                                                                          | 892        |

CENTRAL

**Link:**

[Click to run search](#)

The above Jumpstart will only work for users who have access to this specific database.

**Database:**

EBM Reviews - Cochrane Central Register of Controlled Trials <June 2021>

| # | Query  | Results from 4 Aug 2021 |
|---|--------|-------------------------|
| 1 | Fires/ | 87                      |

|    |                                                                                                         |           |
|----|---------------------------------------------------------------------------------------------------------|-----------|
| 2  | housing/ or housing for the elderly/ or public housing/ or refugee camps/ or independent living/        | 950       |
| 3  | Accidents, Home/                                                                                        | 74        |
| 4  | 2 or 3                                                                                                  | 1,019     |
| 5  | 1 and 4                                                                                                 | 16        |
| 6  | (fire? adj10 (hous* or home? or residen*)).tw,kw.                                                       | 94        |
| 7  | 5 or 6                                                                                                  | 100       |
| 8  | Accident prevention/                                                                                    | 121       |
| 9  | Health Promotion/                                                                                       | 6,061     |
| 10 | Health education/                                                                                       | 4,033     |
| 11 | pc.fs.                                                                                                  | 94,473    |
| 12 | (prevent* or reduc* or decrease? or intervention? or promot* or improve? or program* or educat*).tw,kw. | 1,083,734 |
| 13 | or/8-12                                                                                                 | 1,102,459 |
| 14 | 7 and 13                                                                                                | 97        |
| 15 | limit 14 to yr="1990 -Current"                                                                          | 94        |

|   |                                                                                                        |                    |            |
|---|--------------------------------------------------------------------------------------------------------|--------------------|------------|
| 4 | #1 AND #2                                                                                              | limit to 1990-2021 | 1,511      |
| 3 | #1 AND #2                                                                                              |                    | 1,516      |
| 2 | TS=(prevent* or reduc* or decrease\$ or intervention\$ or promot* or improve\$ or program* or educat*) |                    | 17,035,187 |
| 1 | TS=((fire\$ NEAR/10 hous*) OR (fire\$ NEAR/10 home\$) OR (fire\$ NEAR/10 residen*))                    |                    | 3,223      |

TRoPHI

Freetext (All but Authors): "residential fire\*"

PAIS Index

((MAINSUBJECT.EXACT("Fire") AND MAINSUBJECT.EXACT.EXPLODE("Housing")) OR AB(fire NEAR/10 hous\*) OR AB(fire NEAR/10 home?) OR AB(fire? NEAR/10 residen\*)) AND (MAINSUBJECT.EXACT("Fire Prevention") OR AB(prevent\* OR reduc\* OR decrease OR intervention OR promot\* OR improve? OR program\* OR educat\*))

Additional limits - Date: After January 01 1990

ERIC

| #  | Query     | Limiters/Expanders                                                                                 | Via                                                                           | Last Run | Results |
|----|-----------|----------------------------------------------------------------------------------------------------|-------------------------------------------------------------------------------|----------|---------|
| S7 | S1 AND S5 | Limiters<br><br>- Published Date:<br>19000101-20201231<br><br>Search modes<br><br>- Boolean/Phrase | Interface<br><br>-<br>EBSCOhost Research<br>Databases<br><br>Search<br>Screen |          | 123     |

|    |           |                                                                           |                                                                                                                                            |     |
|----|-----------|---------------------------------------------------------------------------|--------------------------------------------------------------------------------------------------------------------------------------------|-----|
|    |           |                                                                           | <div>- Advanced Search</div> <div>Database</div> <div>- ERIC</div>                                                                         |     |
| S6 | S1 AND S5 | <div>modes</div> <div>Search</div> <div>-</div> <div>Boolean/Phrase</div> | <div>Interface</div> <div>-</div> <div>EBSCOhost Research Databases</div> <div>Search</div> <div>Screen</div> <div>- Advanced Search</div> | 125 |



|    |                |                             |                                                                                                                               |                   |
|----|----------------|-----------------------------|-------------------------------------------------------------------------------------------------------------------------------|-------------------|
|    |                |                             | Database<br><br>- ERIC                                                                                                        |                   |
| S5 | S2 OR S3 OR S4 | modes<br><br>Boolean/Phrase | Search<br><br>-<br><br>Interface<br><br>-<br>EBSCOhost Research<br>Databases<br><br>Search<br>Screen<br><br>- Advanced Search | 1,771<br><br>1,05 |

|    |                                                                                                                                                                                                                           |                                                    |                                                                                                                             |                   |
|----|---------------------------------------------------------------------------------------------------------------------------------------------------------------------------------------------------------------------------|----------------------------------------------------|-----------------------------------------------------------------------------------------------------------------------------|-------------------|
|    |                                                                                                                                                                                                                           |                                                    | Database                                                                                                                    |                   |
|    |                                                                                                                                                                                                                           |                                                    | - ERIC                                                                                                                      |                   |
| S4 | <p>TI ( (prevent* or reduc* or decrease# or intervention# or promot* or improve# or program* or educat*) ) OR AB ( (prevent* or reduc* or decrease# or intervention# or promot* or improve# or program* or educat*) )</p> | <p>modes Search</p> <p>-</p> <p>Boolean/Phrase</p> | <p>Interface</p> <p>-</p> <p>EBSCOhost Research Databases</p> <p>Search Screen</p> <p>- Advanced Search</p> <p>Database</p> | <p>9,084 1,04</p> |

|    |                                                    |                                   |                                                                                                     |            |
|----|----------------------------------------------------|-----------------------------------|-----------------------------------------------------------------------------------------------------|------------|
|    |                                                    |                                   | - ERIC                                                                                              |            |
| S3 | (DE "Health Promotion") OR (DE "Health Education") | modes<br>Search<br>Boolean/Phrase | Interface<br>-<br>EBSCOhost Research Databases<br>Search<br>Screen<br>- Advanced Search<br>Database | 19<br>18,9 |

|    |                      |                         |                                                                                                                               |     |
|----|----------------------|-------------------------|-------------------------------------------------------------------------------------------------------------------------------|-----|
|    |                      |                         | - ERIC                                                                                                                        |     |
| S2 | DE "Fire Protection" | modes<br>Boolean/Phrase | Search<br>-<br>Interface<br>-<br>EBSCOhost Research<br>Databases<br><br>Search<br>Screen<br>- Advanced Search<br><br>Database | 697 |

|    |                                                                                                                                                      |                             |                                                                                                                                               |     |
|----|------------------------------------------------------------------------------------------------------------------------------------------------------|-----------------------------|-----------------------------------------------------------------------------------------------------------------------------------------------|-----|
|    |                                                                                                                                                      |                             | - ERIC                                                                                                                                        |     |
| S1 | TI ( (fire\$ N10 hous*) OR (fire\$ N10 home#) OR (fire\$ N10 residen*) ) OR AB ( (fire\$ N10 hous*) OR (fire\$ N10 home#) OR (fire\$ N10 residen*) ) | modes<br><br>Boolean/Phrase | Search<br><br>-<br><br>Interface<br><br>-<br>EBSCOhost Research<br>Databases<br><br>Search<br>Screen<br><br>- Advanced Search<br><br>Database | 158 |

|  |  |  |        |  |
|--|--|--|--------|--|
|  |  |  | - ERIC |  |
|--|--|--|--------|--|

FireDOC

Title: residential fire AND publication date: 1990-2021

IEEE Xplore

("All Metadata":"residential fire" OR "All Metadata":"residential fires") OR ("All Metadata":"house fire" OR "All Metadata":"house fires") OR ("All Metadata":"home fire" OR "All Metadata":"home fires")

**Filters Applied:** 1990 - 2022

Native Health Database

Keywords: residential fire OR house fire OR home fire

Range Start: 1990

Range End: 2021

Google Scholar

"Residential|house|home+fire+prevention|intervention"

Publication date: 1990-2021

ProQuest Dissertations & Theses Global

(TI(residential NEAR/10 fire\*) OR TI(hous\* NEAR/10 fire\*) OR TI(home NEAR/10 fire\*)) AND (NOFT(prevent\* OR reduc\* OR decrease\* OR intervention\* OR promot\* OR improve\* OR program\* OR educat\*))

Additional limits - Date: From January 01 1990 to December 31 2021

Networked Digital library of Theses and Dissertations (NDLTD)

title:"residential fire" OR title:"residential fires"

PapersFirst (via WorldCat FirstSearch)

(kw: residential w10 fire\*) OR (kw: hous\* w10 fire\*) OR (kw: home w10 fire\*) AND (kw: prevent\* OR kw: reduc\* OR kw: decrease\* OR kw: intervention\* OR kw: promot\* OR kw: improve\* OR kw: program\* OR kw: educat\*) and yr: 1990-2021

Proceedings (via WorldCat FirstSearch)

(kw: residential w10 fire\*) OR (kw: hous\* w10 fire\*) OR (kw: home w10 fire\*) AND (kw: prevent\* OR kw: reduc\* OR kw: decrease\* OR kw: intervention\* OR kw: promot\* OR kw: improve\* OR kw: program\* OR kw: educat\*) and yr: 1990-2021

OpenGrey

"residential fire" OR "residential fires"

Grey Literature Report

"residential fire" OR "residential fires"

DesLibris

Residential fire

Limit to public documents

Australian Institute of Health and Welfare

"Residential fire"

"Residential fires"

New Zealand Ministry of Health Library

Residential fire

Govinfo

collection:(GPO OR BUDGET OR CZIC OR CFR OR CPD OR BILLS OR CCAL OR CPRT OR CDIR OR CDOC OR  
CHRG OR CREC OR CRECB OR CRI OR CRPT OR SERIALSET OR ECONI OR ERP OR ERIC OR FR OR  
GAOREPORTS OR HOB OR HMAN OR HJOURNAL OR LSA OR GOVPUB OR PAI OR PPP OR PLAW OR SMAN  
OR COMPS OR STATUTE OR USCODE OR USCOURTS OR GOVMAN) AND null AND title:(residential fire)

Training Programs in Epidemiology and Public Health Interventions Network (TEPHINET)

Residential fire

Google Search

residential fire+intervention | program | education filetype:pdf

Narrowed to each geographical area identified

First 100 results taken for each when >100 results available
